# Supplementary material for: The role of CDX2 in renal tubular lesions during diabetic kidney disease
Source: Aging (Albany NY). 2021 Feb 17;13(5):6782–803. doi: 10.18632/aging.202537 (PMC7993706; doi:10.18632/aging.202537)
Supplement: Supplementary Table 1 [file aging-13-202537-s002.pdf]

## SUPPLEMENTARY TABLE

**Supplementary Table 1. Pathological diagnosis information of human kidney samples.**

| Patient ID | Gender | Age | Diagnosis                                                                                                |
|------------|--------|-----|----------------------------------------------------------------------------------------------------------|
| K180388    | male   | 53  | Tuberous sclerotic diabetic nephropathy(Tervaert classification III)                                     |
| K180430    | male   | 53  | Tuberous sclerotic diabetic nephropathy(Tervaert classification III)                                     |
| K180692    | male   | 43  | Tuberous sclerotic diabetic nephropathy(Tervaert classification III)                                     |
| K1900006   | male   | 35  | Tuberous sclerotic diabetic nephropathy(Tervaert classification III)                                     |
| K1900048   | male   | 50  | Tuberous sclerotic diabetic nephropathy(Tervaert classification III)Subacute tubular-interstitial injury |
| K1900025   | female | 59  | Tuberous sclerotic diabetic nephropathy(Tervaert classification III)                                     |
| K1804010   | male   | 45  | Splenic rupture and bleeding, left kidney rupture and bleeding (renal trauma)                            |
| K1835669   | male   | 24  | Left kidney rupture and bleeding (renal trauma)                                                          |
| K1912839   | male   | 38  | Right kidney rupture and bleeding (renal trauma)                                                         |
| K1924782   | male   | 30  | Left kidney rupture and bleeding (renal trauma)                                                          |
| K2001748   | male   | 26  | Left kidney rupture and bleeding (renal trauma)                                                          |
| K2008184   | male   | 13  | Right kidney rupture and bleeding (renal trauma)                                                         |
